# Supplementary material for: Cerebrospinal Fluid Findings in 541 Patients With Clinically Isolated Syndrome and Multiple Sclerosis: A Monocentric Study
Source: PubMed Central journal article supplement (PMC8248497; doi:10.3389/fimmu.2021.675307), 2021-06-17
Supplement: DataSheet_1.pdf [file DataSheet_1.pdf]

**Figure S1:** Time to relapse depending on CSF cells

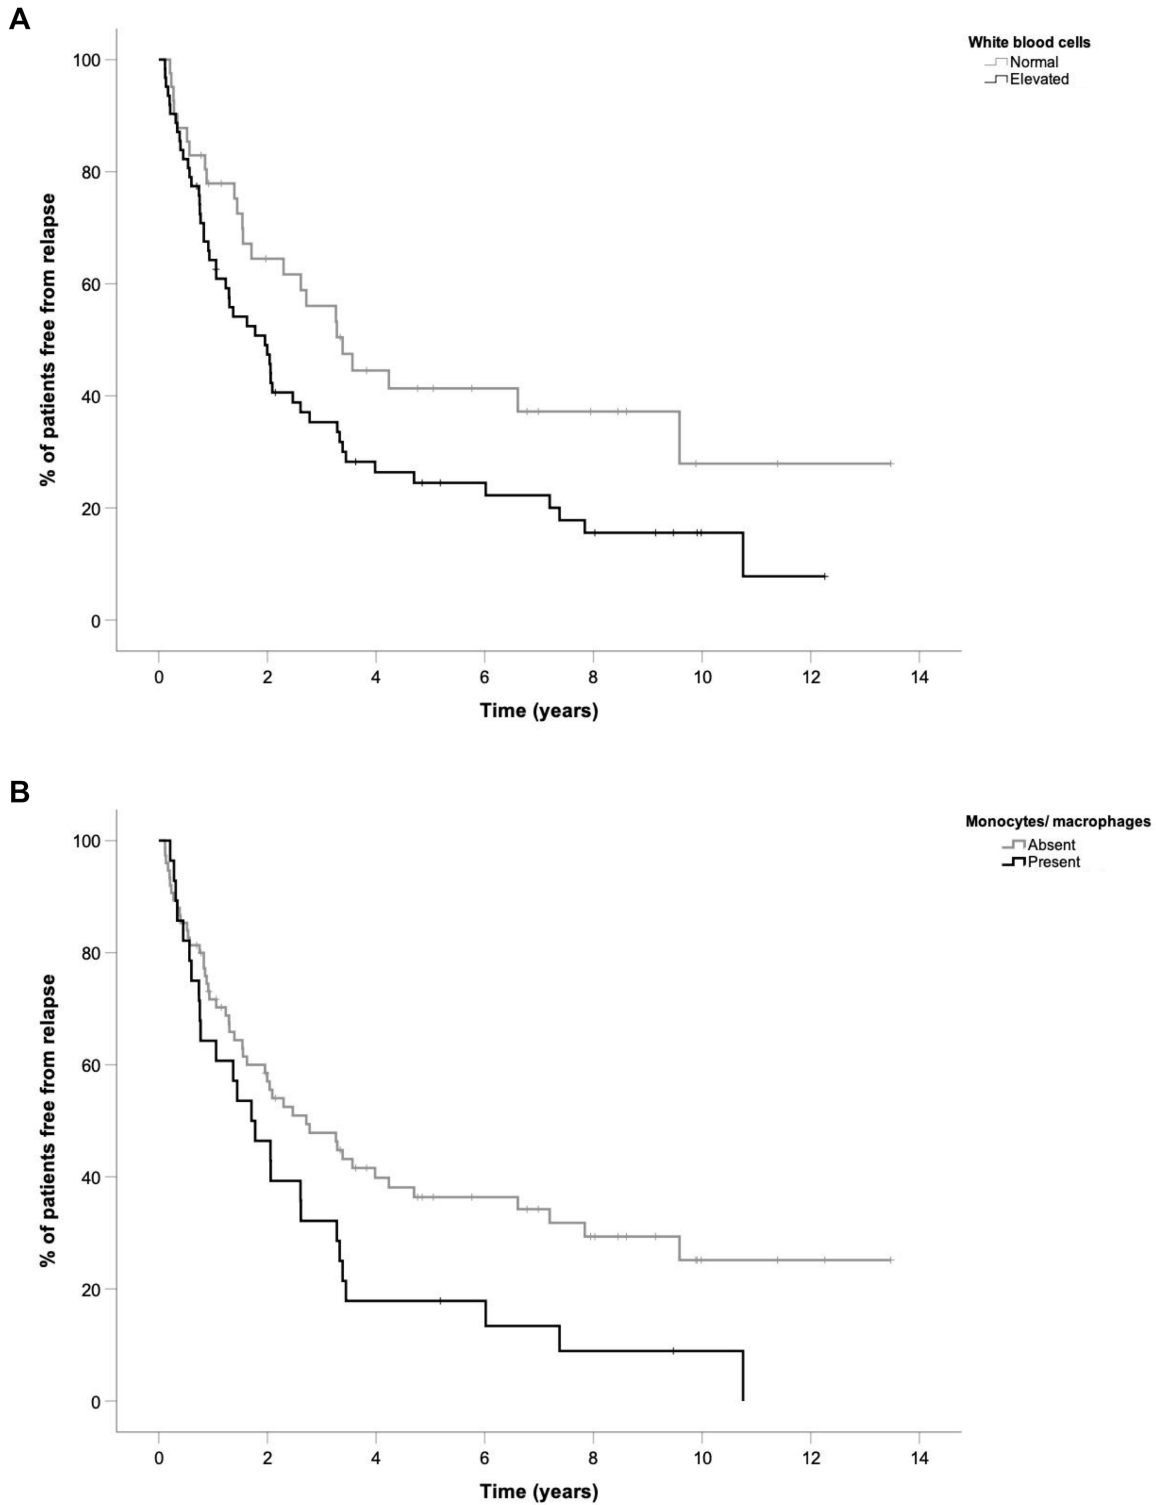

Kaplan-Meier survival curves for the time to relapse depending on  
(A) CSF pleocytosis (Log Rank test:  $p=0.032$ ) and  
(B) presence of monocytes/ macrophages in CSF cytology (Log Rank test:  $p=0.027$ ).  
CSF, cerebrospinal fluid
