# Supplementary material for: Cerebrospinal Fluid Findings in 541 Patients With Clinically Isolated Syndrome and Multiple Sclerosis: A Monocentric Study
Source: PubMed Central journal article supplement (PMC8248497; doi:10.3389/fimmu.2021.675307), 2021-06-17
Supplement: DataSheet_2.pdf [file DataSheet_2.pdf]

## Supplementary methods

### Auer & Hegen formulae

$$Q_{lim}(IgX) = a \times Q_{alb}^b \quad (1)$$

| Ig isotypes | a     | b     |
|-------------|-------|-------|
| IgG         | 0.882 | 1.035 |
| IgA         | 0.819 | 1.076 |
| IgM         | 1.845 | 1.340 |

$$IgX_{int} = (Q_{IgX} - Q_{lim\ IgX}) \times IgX_{ser} \quad (2)$$

$$Ig_{IF} = \frac{IgX_{int}}{IgX_{CSF}} \times 100 \quad (3)$$

Formula (1): The  $Q_{alb}$ -based cut-off Ig quotient ( $Q_{lim\ IgX}$ ) is calculated by inserting the empirically determined values for  $a$  and  $b$ .

Formula (2): The amount of intrathecally synthesised Ig ( $IgX_{int}$ ) is calculated.

Formula (3): The percentage of an intrathecally synthesised Ig fraction ( $Ig_{IF}$ ) in the CSF is calculated.

### Reiber formulae

$$Q_{lim}(IgX) = \frac{a}{b} \times \sqrt{Q_{alb}^2 + b^2} - c \quad (1)$$

| Ig isotypes | a/b  | $b^2 \times 10^6$ | $c \times 10^3$ |
|-------------|------|-------------------|-----------------|
| IgG         | 0.93 | 6                 | 1.7             |
| IgA         | 0.77 | 23                | 3.1             |
| IgM         | 0.67 | 120               | 7.1             |

$$IgX_{int} = (Q_{IgX} - Q_{lim\ IgX}) \times IgX_{ser} \quad (2)$$

$$Ig_{IF} = \frac{IgX_{int}}{IgX_{CSF}} \times 100 \quad (3)$$

Formula (1): The  $Q_{alb}$ -based cut-off Ig quotient ( $Q_{lim\ IgX}$ ) is calculated by inserting the empirically determined values for  $a$ ,  $b$  and  $c$ . For convenience, the values for  $a/b$ ,  $b^2 \times 10^6$  and  $c \times 10^3$  are provided.

Formula (2): The amount of intrathecally synthesised Ig ( $IgX_{int}$ ) is calculated.

Formula (3): The percentage of an intrathecally synthesised Ig fraction ( $Ig_{IF}$ ) in the CSF is calculated.

**Abbreviations:** Ig, immunoglobulin;  $IgX_{CSF}$ , Ig concentration in CSF;  $IgX_{ser}$ , Ig concentration in serum;  $Q_{alb}$ , CSF/serum albumin quotient;  $Q_{IgX}$ , CSF/serum Ig quotient
